# Supplementary figures and images for: Single-atom Pt on non-metal modified graphene sheets as efficient catalysts for CO oxidation
Source: Royal Society of Chemistry journal article supplement (doi:10.1039/c8nj06239k), 2019-01-01

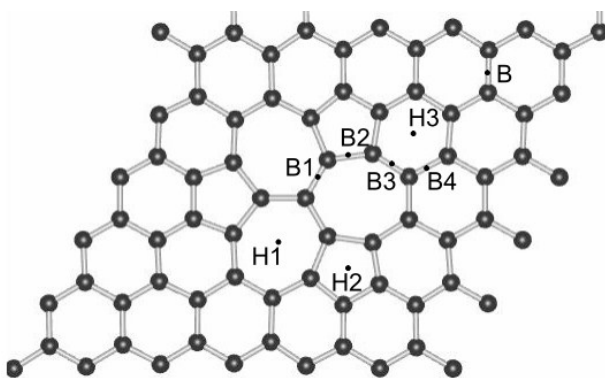

Fig. S1. The bridge (B) and hollow (H) sites for Pt adatom on 555-777 graphene.

Supplement: c8nj06239k1.pdf [file c8nj06239k1.pdf]
